# Supplementary material
Source: PubMed Central journal article supplement (PMC6583686)
Supplement: jamapsychiatry-75-1225-s001.pdf [file jamapsychiatry-75-1225-s001.pdf]

## Supplementary Online Content

Roberts AL, Kubzansky LD, Malspeis S, Feldman CH, Costenbader KH. Association of depression with risk of incident systemic lupus erythematosus in women assessed across 2 decades. *JAMA Psychiatry*. Published online September 12, 2018. doi:10.1001/jamapsychiatry.2018.2462

**eTable 1.** Characteristics of SLE in Women With Incident SLE, NHS and NHS II, 1992-2013

**eTable 2.** Adjusted Hazard Ratios and 95% Confidence Intervals (CI) for SLE Incidence by Depression Status, NHS & NHS II, 1992-2013

This supplementary material has been provided by the authors to give readers additional information about their work.

**eTable 1. Characteristics of SLE in Women With Incident SLE, NHS and NHS II, 1992-2013**

|                                                     | Total |        |
|-----------------------------------------------------|-------|--------|
|                                                     | N     | Col %  |
| Total                                               | 145   | 100.00 |
| Race                                                |       |        |
| White                                               | 129   | 88.97  |
| Non-white                                           | 16    | 11.03  |
| Anti-nuclear antibody (ANA) positive                |       |        |
| No                                                  | 1     | 0.69   |
| Yes                                                 | 144   | 99.31  |
| Arthritis                                           |       |        |
| No                                                  | 47    | 32.41  |
| Yes                                                 | 98    | 67.59  |
| Hematologic Involvement                             |       |        |
| No                                                  | 47    | 32.41  |
| Yes                                                 | 98    | 67.59  |
| Renal Involvement                                   |       |        |
| No                                                  | 131   | 90.34  |
| Yes                                                 | 14    | 9.66   |
| Seen by an ACR member rheumatologist                |       |        |
| No                                                  | 23    | 15.86  |
| Yes                                                 | 122   | 84.14  |
| Cohort                                              |       |        |
| NHS                                                 | 43    | 29.66  |
| NHSII                                               | 102   | 70.34  |
| Double-stranded DNA positive                        |       |        |
| No                                                  | 70    | 48.28  |
| Yes                                                 | 75    | 51.72  |
| Any of: dsDNA, Smith, RNP, Ro, La antibody positive |       |        |
| No                                                  | 57    | 39.31  |
| Yes                                                 | 88    | 60.69  |

**eTable 2. Adjusted Hazard Ratios and 95% Confidence Intervals (CI) for SLE Incidence by Depression Status, NHS & NHS II, 1992-2013**

|                          | <b>Model 1: Adjusted for race and age</b>     | <b>Model 2: Model 1, further adjusted for BMI, smoking, oral contraceptive use, and postmenopausal hormone use</b> | <b>Model 3: Model 2, further adjusted for diet quality, alcohol use, region of residence, Census tract median income, exercise, early menstruation</b> |
|--------------------------|-----------------------------------------------|--------------------------------------------------------------------------------------------------------------------|--------------------------------------------------------------------------------------------------------------------------------------------------------|
|                          | <b>Hazard Ratio (95% confidence interval)</b> |                                                                                                                    |                                                                                                                                                        |
| <b>Depression status</b> |                                               |                                                                                                                    |                                                                                                                                                        |
| No depression            | 1.00 [Reference]                              | 1.00 [Reference]                                                                                                   | 1.00 [Reference]                                                                                                                                       |
| History of depression    | 2.67 (1.91-3.75)                              | 2.45 (1.74, 3.45)                                                                                                  | 2.37 (1.67, 3.34)                                                                                                                                      |
